# Supplementary material for: One-year Mediterranean diet promotes epigenetic rejuvenation with country- and sex-specific effects: a pilot study from the NU-AGE project
Source: Springer Nature journal article supplement (doi:10.1007/s11357-019-00149-0), 2020-01-24

Italy AgeAccel

10  
5  
0  
-5  
-10

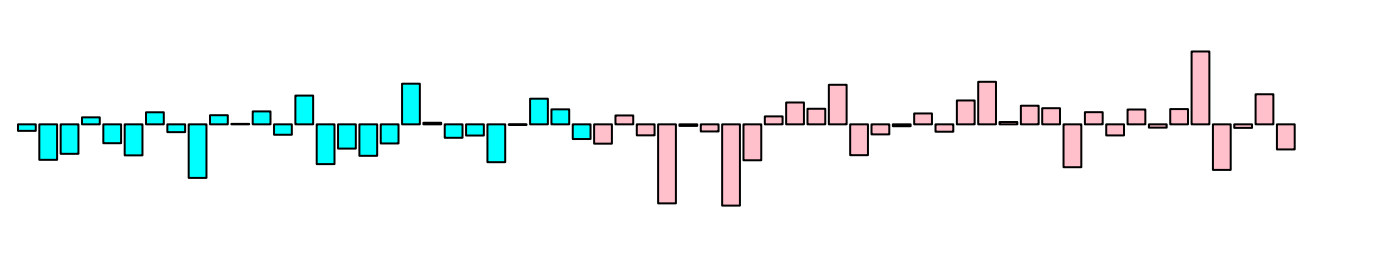

Poland AgeAccel

10  
5  
0  
-5  
-10

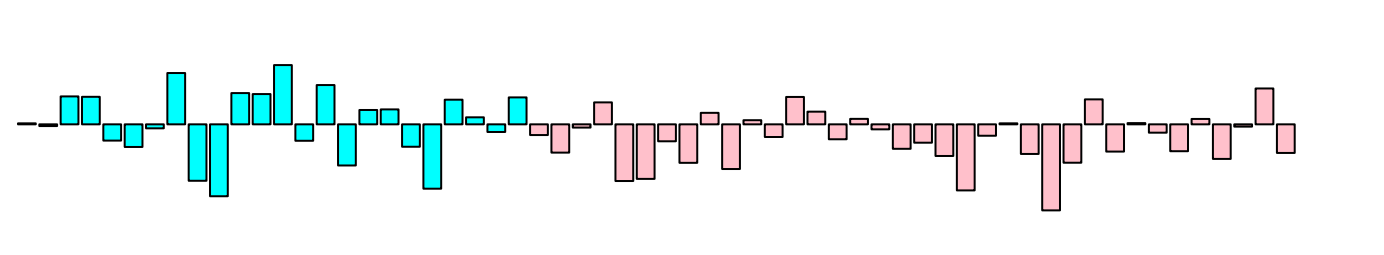

Italy IEAA

10  
5  
0  
-5  
-10

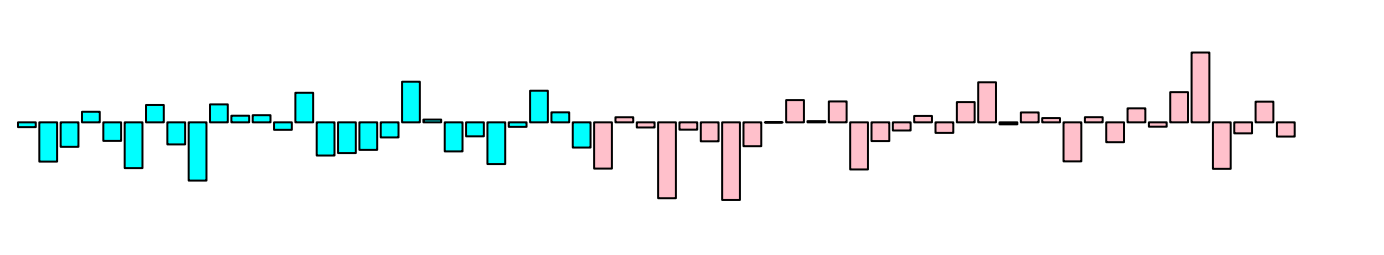

Poland IEAA

10  
5  
0  
-5  
-10

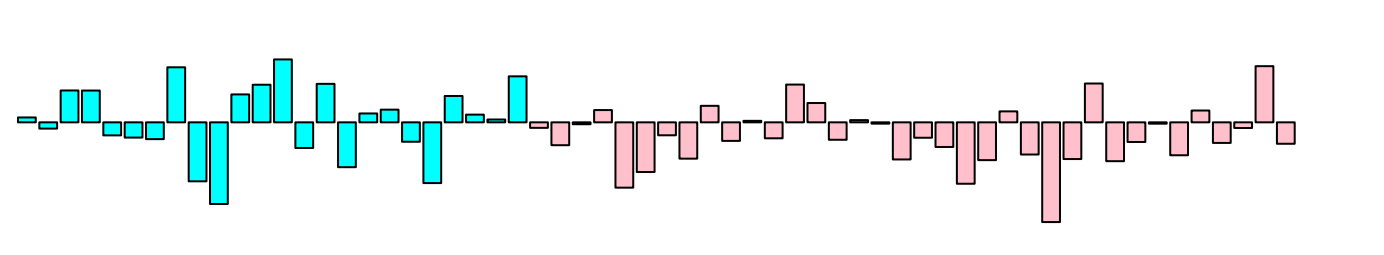

Italy EEAA

10  
5  
0  
-5  
-10

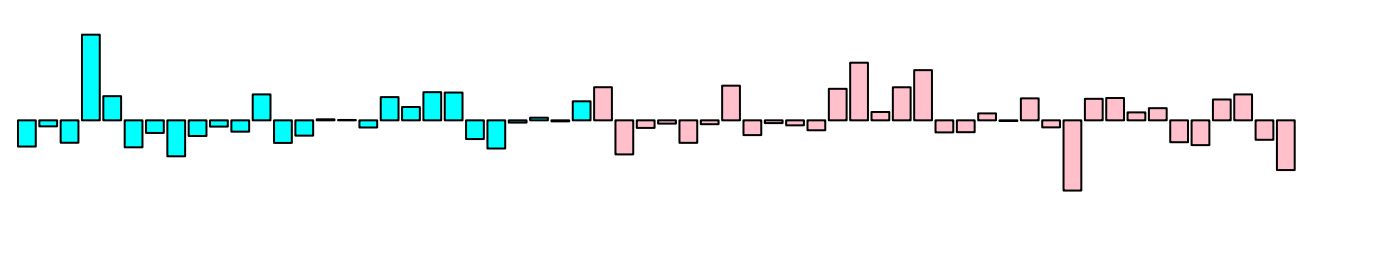

Poland EEAA

10  
5  
0  
-5  
-10

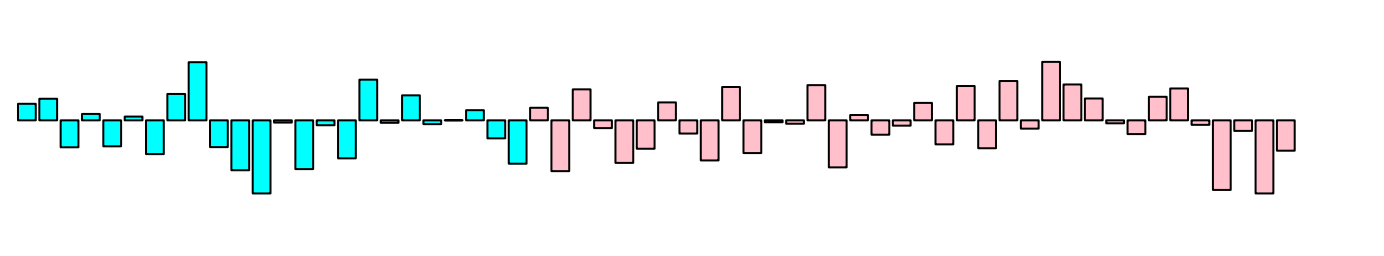

Supplement: MOESM4 [file 11357_2019_149_MOESM4_ESM.pdf]
